# Supplementary material for: Upregulation of the lncRNA Meg3 induces autophagy to inhibit tumorigenesis and progression of epithelial ovarian carcinoma by regulating activity of ATG3
Source: PubMed Central journal article supplement (PMC5458242; doi:10.18632/oncotarget.15955), 2017-03-07
Supplement: oncotarget-08-31714-s001.pdf [file oncotarget-08-31714-s001.pdf]

## Upregulation of the lncRNA Meg3 induces autophagy to inhibit tumorigenesis and progression of epithelial ovarian carcinoma by regulating activity of ATG3

### SUPPLEMENTARY TABLES

Supplementary Table 1: LncRNA MEG3 expression in normal ovary and ovarian carcinoma tissues

| Groups                     | N  | LncRNA MEG3 expression / 18s | P value                |
|----------------------------|----|------------------------------|------------------------|
| Normal Ovary               | 8  | 0.0106 ± 0.0124              | <b><i>4.55E-05</i></b> |
| Benign tumors              | 17 | 0.0062 ± 0.0069              | <b><i>0.002</i></b>    |
| Borderline tumors          | 6  | 0.0041 ± 0.0096              | 0.183                  |
| Ovarian carcinoma          | 95 | 0.0022 ± 0.0048              |                        |
| Metastatic omentum tissues | 25 | 0.0007 ± 0.0016              | 0.071                  |

Bold and Italics means  $P < 0.05$ .

**Supplementary Table 2: Correlation of LncRNA MEG3 expression with different clinicopathological features of ovarian carcinoma**

| Clinicopathological features    | N  | LncRNA TDRG1 expression / 18s | <i>P</i> value      |
|---------------------------------|----|-------------------------------|---------------------|
| <b>The pathology types</b>      |    |                               | 0.100               |
| Serous carcinoma                | 74 | 0.0018 ± 0.0046               |                     |
| The other pathology types       | 21 | 0.0034 ± 0.0053               |                     |
| <b>Age</b>                      |    |                               | 0.288               |
| ≤ 53                            | 47 | 0.0025 ± 0.0053               |                     |
| > 53                            | 48 | 0.0019 ± 0.0043               |                     |
| <b>FIGO stages</b>              |    |                               | <b><i>0.030</i></b> |
| I-II                            | 40 | 0.0033 ± 0.0051               |                     |
| III-IV                          | 55 | 0.0014 ± 0.0044               |                     |
| <b>Pathology classification</b> |    |                               | 0.331               |
| Well                            | 28 | 0.0025 ± 0.0045               |                     |
| Mod + Poor                      | 67 | 0.0020 ± 0.0049               |                     |

Bold and Italics means  $P < 0.05$ .

Supplementary Table 3: Primers for RT-PCR

| Gene          | Primer sequence                                                | Product size (bp) | Extension time (sec) |
|---------------|----------------------------------------------------------------|-------------------|----------------------|
| <i>MEG3</i>   | F: 5'- TGCTTCCTGACTCGCTCTA-3'<br>R: 5'- CTTCCATCCGCAGTTCTT-3'  | 234               | 34                   |
| <i>ATG3</i>   | F: 5'-GTCCACCACTGTCCAA-3'<br>R: 5'-GCTTCCGTTATTCCTG-3'         | 227               | 34                   |
| <i>ATG7</i>   | F: 5'- GAACAAGCAGCAAATGA-3'<br>R: 5'- GACAGAGGGCAGGATAG-3'     | 148               | 34                   |
| <i>LC3</i>    | F: 5'- TCGCCGACCGCTGTAA-3'<br>R: 5'- AAGCCGTCCTCGTCTTTCT-3'    | 286               | 34                   |
| <i>SQSTM1</i> | F: 5'- TGGAGCACGGAGGGAA-3'<br>R: 5'- TCTGGCATCTGTAGGGACTG-3'   | 304               | 34                   |
| <i>LAMP1</i>  | F: 5'- TGACAAGGCTTCTCAACATC-3'<br>R: 5'- CATTCAATCCCGAACTGG-3' | 126               | 34                   |
| <i>18s</i>    | F: 5'- GAAACGGCTACCACATCC-3'<br>R: 5'- ACCAGACTTGCCCTCCA-3'    | 167               | 34                   |

AT = annealing temperature.
